# Supplementary material for: Observation of neutrophil extracellular traps in the development of diabetic nephropathy using diabetic murine models
Source: PubMed Central journal article supplement (PMC11542270; doi:10.1186/s42826-024-00226-2), 2024-11-07

**C**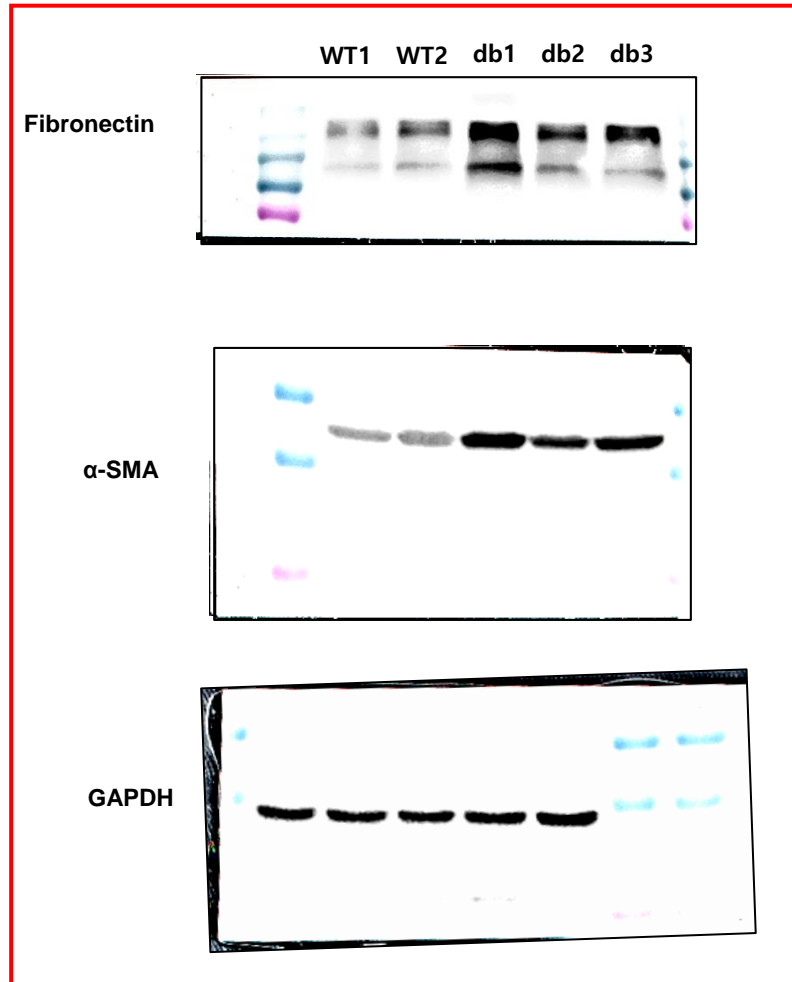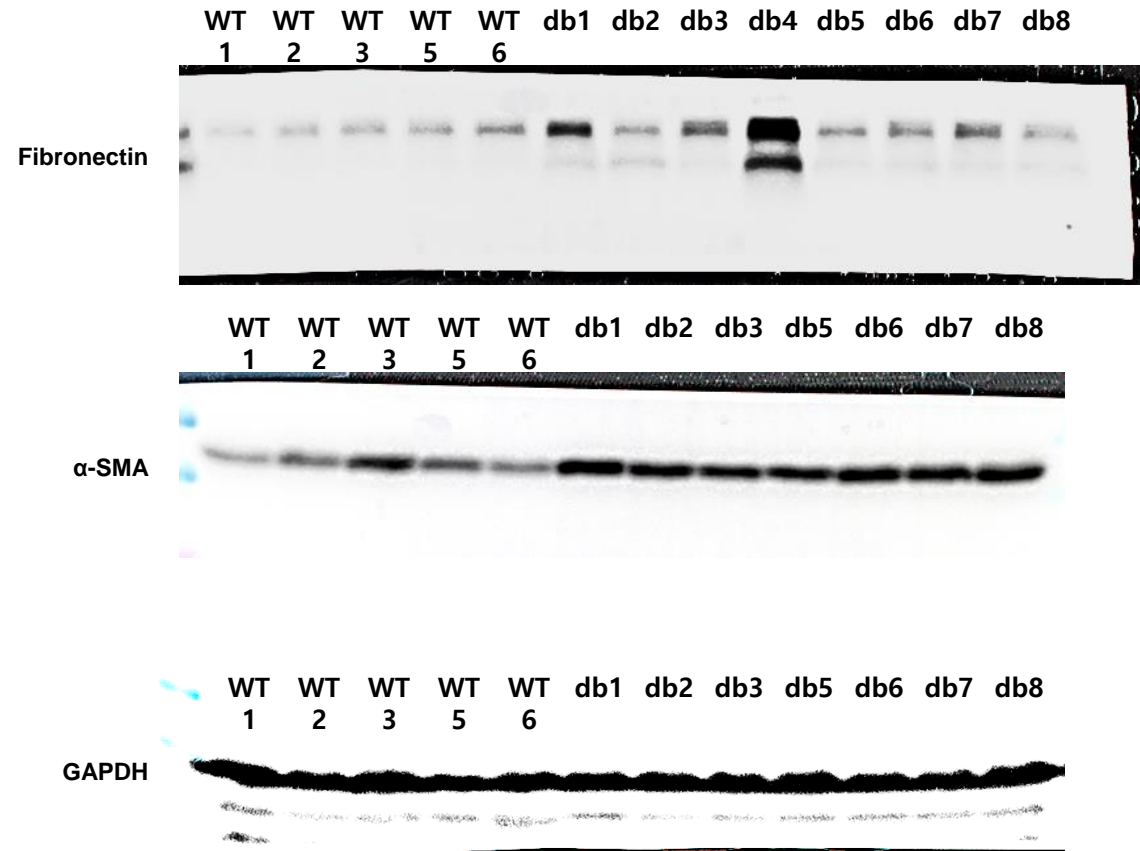

**Figure 2.** High glucose serum levels induced the progression of fibrosis in diabetic kidney tissue. (C) Fibronectin and α-SMA protein levels in db/db 20-week-old mice were determined by Western blot. n = 4–6 each group. (F) Fibronectin and α-SMA protein levels in STZ-induced diabetic models were determined by Western blot. n = 4–6 each group.

**F****STZ 8weeks**

WT 1 WT 2 STZ 1 STZ 2 STZ 3

Fibronectin

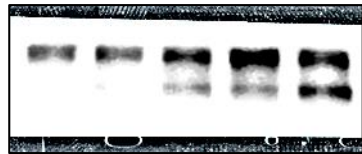

A-SMA

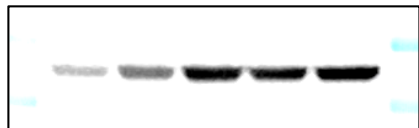

GAPDH

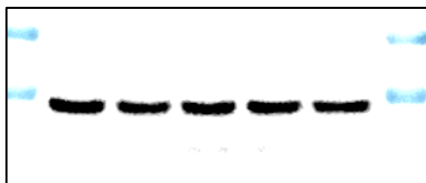

Fibronectin

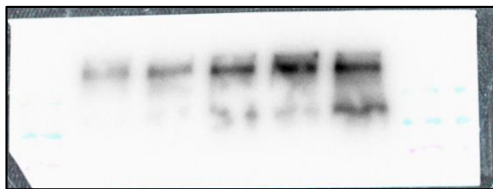

A-SMA

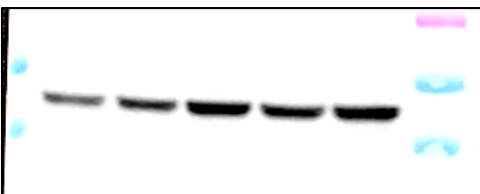

GAPDH

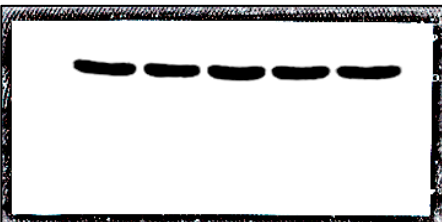**STZ 12weeks**

WT 1 WT 2 STZ 1 STZ 2 STZ 3

Fibronectin

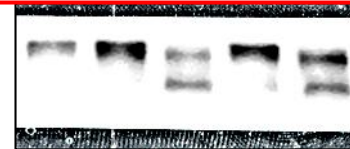

A-SMA

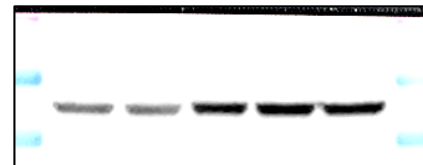

GAPDH

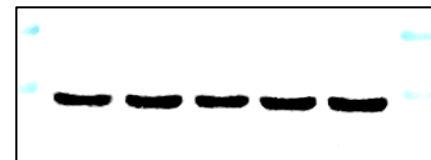

Fibronectin

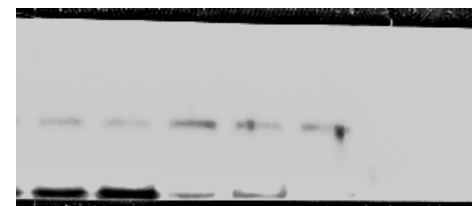

A-SMA

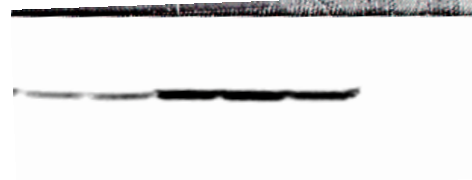

GAPDH

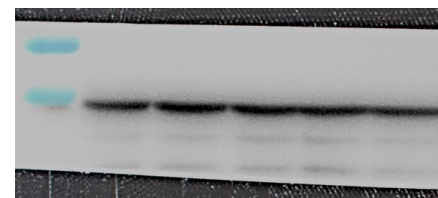

Supplement: 42826_2024_226_MOESM1_ESM.pdf [file 42826_2024_226_MOESM1_ESM.pdf]
